# Supplementary material
Source: publisher figshare collection journal article supplement (https://gsapubs.figshare.com/ndownloader/files/39640027)
Supplement: Supplementary file 1 [file 39640027]

## Sheet: Table S9
Table S9. Rare Earth Elements (ppm) analyses of the tested zircons from the retrograde eclogites.
Spots	La	Ce	Pr	Nd	Sm	Eu	Gd	Tb	Dy	Ho	Er	Tm	Yb	Lu
LH-1	2.21096	1.42339	0	0.837063	13.198	16.2135	33.1645	64.4815	116.28	107.279	91.847	77.5406	73.6369	52.3226
LH-2	2.65627	2.61735	0.494451	3.133	7.69857	0.900344	10.8627	22.0418	79.602	108.532	136.203	113.017	132.402	128.174
LH-3	0	1.10524	0.938655	0	6.95526	4.3971	4.01001	35.6054	91.5619	149.689	175.64	141.471	189.672	139.701
LH-4	0.688174	1.74003	0.922344	3.64424	19.9434	30.8166	81.5674	115.675	192.155	157.434	192.724	177.874	296.684	194.176
LH-5	1.66992	2.25565	0.149043	1.6901	0	8.41494	39.6382	46.9095	117.938	134.422	188.576	215.34	330.576	264.868
LH-6	2.05094	1.87189	1.58887	1.32544	7.39263	9.95979	13.3189	14.249	55.6269	103.228	177.912	199.83	306.966	336.107
LH-7	1.55894	1.48304	0	2.05135	0	11.248	32.5039	70.4985	140.004	165.897	200.232	139.595	166.981	124.219
LH-8	0.382344	0.158345	0	1.77264	0	21.528	12.7808	50.4053	92.027	124.374	131.272	103.906	114.572	97.6138
LH-9	0.278436	0	0	0.177664	0	0	19.7469	50.7295	131.028	122.958	140.823	102.628	118.437	85.7791
LH-10	1.55419	1.40695	0.0649127	0	0.275035	6.03905	17.4167	35.087	94.5992	102.919	124.829	92.2811	111.083	95.6423
LH-11	0	0.110272	0.331769	0	0	4.40962	2.20924	9.10958	20.1875	34.1014	33.6118	26.1447	27.2537	31.9065
LH-12	0.23836	1.62199	0	3.19954	11.5884	11.9857	28.5943	39.8813	62.6599	65.5039	58.6317	51.0352	55.5291	58.1841
LH-13	0	0.589806	0	0.263029	0.95972	3.37159	8.17732	45.0008	123.236	143.765	167.506	137.332	144.353	159.131
LH-14	0	0.282482	2.3191	0.588987	0	2.48794	8.99732	22.8088	79.3238	82.8553	87.2238	50.4994	64.8582	61.5469
LH-15	0.350083	0.882941	0.784799	0.784947	7.20819	0	8.12109	36.5184	85.747	132.71	181.376	153.673	168.224	166.355
LH-16	0.841382	0.932791	0	2.45359	0.351782	7.66861	9.84932	21.0541	48.433	66.0297	110.322	121.4	173.985	192.125
LH-17	0.296217	0.349122	0	0	7.43344	0	1.75406	17.632	95.0127	120.894	118.659	82.1397	100.991	86.0887
LH-18	1.06791	1.40708	0	1.38487	0	2.66388	23.1246	46.7102	90.3726	104.248	71.6981	66.0775	78.2206	49.5213
LH-19	0	0.574552	0.117724	1.15101	1.63064	0	0	17.9688	57.0131	65.2056	76.9758	91.1366	184.315	278.142
LH-20	0	0.327642	1.22911	0	2.02292	0	10.2992	13.053	43.5254	59.5757	69.4654	79.7737	103.042	107.924
LH-21	0.576027	1.57992	0.31165	1.29508	6.32496	0	11.366	14.1875	41.5648	69.3987	158.082	184.055	271.342	255.126
LH-22	0.591856	0.484315	1.16891	0	2.24394	2.44653	25.3356	45.0766	72.3094	61.2596	51.4479	45.1897	39.2363	37.1091
LH-23	0	1.20849	2.183	0.990475	1.32785	8.68554	14.1955	41.6408	84.7968	123.063	149.167	126.876	130.307	109.866
LH-24	0.550709	1.23286	1.52643	1.54986	4.06464	6.69429	15.5618	38.1738	77.41	93.1016	114.021	99.4681	111.961	73.8069
LH-25	1.8312	6.96453	0.72527	4.13449	3.07752	10.8586	15.1522	54.1945	92.5139	76.5574	87.0722	62.3766	112.227	132.089
LH-26	1.84441	1.47566	2.83153	0.324047	4.57375	5.53118	0	24.713	72.334	92.5765	120.412	98.0987	118.368	95.7421
LH-27	0	0	0	0	0	6.41457	7.31695	14.7049	44.5366	65.3595	98.3325	95.7552	121.105	119.672
LH-28	0	0.178938	1.982	0	3.04745	8.05103	14.4667	54.8263	156.443	219.826	258.483	206.53	225.294	174.369
LH-29	0.761847	0.29996	0	0	0	3.32441	1.64729	36.9209	80.989	104.724	125.503	84.7664	93.1279	74.2251
LH-30	0.886874	0.0849472	0	1.08658	2.9089	9.76416	13.6908	47.0415	101.488	106.98	102.611	61.149	78.6163	63.1828
LH-31	0	0.749381	0.975153	3.26806	0	4.32826	15.5727	56.5797	103.874	94.2448	106.25	66.9656	110.084	69.3735
LH-32	0.248353	1.02708	0.713504	0.281734	12.2534	6.07031	18.3201	29.443	48.303	81.3148	109.172	104.618	167.616	186.887
LH-33	0	0.447534	0	0	0	5.657	11.1359	25.6234	61.2061	71.4064	83.6629	59.9849	66.139	52.8649
LH-34	0.110591	0	0.742267	0.345697	3.64312	4.97091	23.1924	80.3821	166.13	159.099	185.846	130.279	140.26	137.282
LH-35	0.0143603	1.84306	0	1.6767	6.04294	2.39736	19.3929	24.8396	56.1808	78.1123	92.6904	73.8296	89.6348	74.278
LH-36	0	0	0	0	3.81832	0	11.2718	47.8443	162.674	200.527	233.948	165.507	195.444	154.993
LH-37	0	2.41886	0	0.793769	3.96582	6.88294	19.0674	45.3441	115.751	87.7292	97.7441	71.542	103.417	95.1742
LH-38	1.29738	2.477	0	0.829913	0.600762	9.85423	37.303	29.8836	81.7255	108.978	153.16	149.445	189.26	168.275
LH-39	0	0.266818	0.327333	2.09643	0	7.5119	38.7784	63.8421	141.434	157.012	175.162	127.36	189.23	148.376
LH-40	1.76729	0.440473	0.91915	0	4.61785	5.2909	18.5293	46.9156	150.217	213.485	271.718	229.852	301.343	236.747
LH-41	0.396656	0	1.3583	0	0	4.10518	28.4084	66.0289	161.306	151.222	149.576	125.103	128.87	106.172
LH-42	0.387167	0.206311	0.643863	0.0443306	0	0	0	23.9243	86.432	122.838	164.391	116.704	158.864	141.388
LH-43	2.80698	1.42427	2.02806	0.206744	9.4003	7.84223	15.1397	22.5755	41.7506	55.174	87.9542	108.534	211.306	259.503
LH-44	2.2669	2.72742	1.99303	1.90279	6.7151	7.0186	5.6308	12.1092	26.5905	36.2625	75.1473	103.654	181.312	214.832
